# Supplementary material
Source: Springer Nature journal article supplement (https://www.springermedizin.de/resource/supplementary/12936_2009_1084_MOESM3_ESM.pdf/9549662)
Supplement: MOESM3 [file 9549662]

# Sample 1

Q-KNG Q-KNG Q-KNG Q-KNG

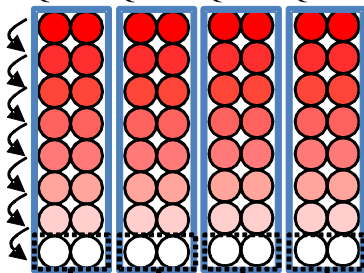

**1° Plate:**  
Q-KNG, E-KNG,  
Q-TSR, or E-TSR

From Q-KNG 1 Plate:

From E-KNG 1 Plate:

From Q-TSR 1 Plate:

From E-TSR 1 Plate:

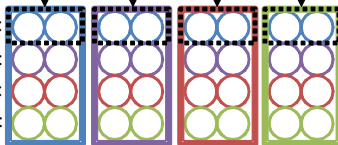

Q-KNG E-KNG Q-TSR E-TSR

**2° Plate:**  
Q-KNG, E-KNG,  
Q-TSR, and E-TSR
